# Supplementary material for: The Complexity and Dynamics of the Tissue Glycoproteome Associated With Prostate Cancer Progression
Source: Mol Cell Proteomics. 2021 Jan 5;20:100026. doi: 10.1074/mcp.RA120.002320 (PMC8010466; doi:10.1074/mcp.RA120.002320)

## Supporting Information (SI) for

### **The complexity and dynamics of the tissue glycoproteome associated with prostate cancer progression**

Rebeca Kawahara<sup>1,2,3</sup>, Saulo Recuero<sup>4</sup>, Miguel Srougi<sup>4</sup>, Katia R.M. Leite<sup>4</sup>, Morten Thaysen-Andersen<sup>2,3#§</sup>, and Giuseppe Palmisano<sup>1#§</sup>

<sup>1</sup>Instituto de Ciências Biomédicas, Departamento de Parasitologia, Universidade de São Paulo, USP, São Paulo, Brazil.

<sup>2</sup>Department of Molecular Sciences, Macquarie University, Sydney, NSW, Australia

<sup>3</sup>Biomolecular Discovery Research Centre, Macquarie University, Sydney, NSW, Australia

<sup>4</sup>Laboratório de Investigação Médica da Disciplina de Urologia da Faculdade de Medicina da USP, LIM55, São Paulo, Brazil.

§ These authors share authorship

\* To whom correspondence should be addressed:

i. GlycoProteomics Laboratory, Department of Parasitology, Institute of Biomedical Sciences, University of São Paulo, Avenida Lineu Prestes 1374, CEP: 05508-000, São Paulo, Brazil. Email: palmisano.gp@usp.br

ii. Department of Molecular Sciences, Macquarie University, Sydney, NSW 2109, Australia. E-mail: morten.andersen@mq.edu.au

**Keywords:** glycosylation, glycomics, glycoproteomics, mass spectrometry, prostate cancer

Running title: The glycoproteome dynamics underpinning prostate cancer progression

## **Supplementary Figures Legends**

**Supplemental Figure 1 Example of N-glycan isomeric separation by PGC and MSMS fragment-specific substructure diagnostic ions.** A) Distinct PGC-LC elution pattern for  $\alpha$ 2,6 and  $\alpha$ 2,3 sialic acid and fragment-specific substructure diagnostic ions for core fucosylation and 6 arm composition. B) Fragment-specific substructure diagnostic ions for LacdiNac containing N-glycans. C) Fragment-specific substructure diagnostic ions for bisecting containing N-glycans. D) Fragment-specific substructure diagnostic ions for NeuGc containing N-glycans.

**Supplementary Figure 2 Overview of the reproducibility of unique glycoform identified in the prostate tissue.** A) Distribution of (number) and % of unique glycoforms identified across 10-100% of the 54 files. The numbers in parenthesis show the number of glycoforms. B) Distribution of (number) and % of unique glycoforms identified across 1-6 conditions (five Pca grades and BPH) is shown in the bar graph.

### **Supplementary Tables Legends**

Supplemental Table SA: Clinical information of the patients included in the study

Supplementary Table SB: Overview of the raw files and search parameters.

Supplementary Table S1: N-glycome dataset of PCa and BPH tissues.

Supplementary Table S2: O-glycome dataset of PCa and BPH tissues.

Supplementary Table S3: Intact N-glycopeptide dataset of PCa and BPH tissues.

Supplementary Table S4: Intact O-glycopeptide dataset of PCa and BPH tissues.

Supplementary Table S5: De-N-glycopeptide dataset of PCa and BPH tissues.

Supplementary Table S6: Proteome dataset of PCa and BPH tissues.

Supplementary Table S7: Significant correlated intact N-glycopeptide with N-glycan structure.

Supplementary Table S8: Significant correlated intact O-glycopeptide with O-glycan structure.

### **Supplementary Data Legends**

Supplementary Data S1: Spectra evidences for reduced N-glycans (alditols) released from PCa and BPH tissues

Supplementary Data S2: Spectra evidences for reduced O-glycans (alditols) released from PCa and BPH tissues

# Supplementary Figures

## Supplementary Figure S1

A

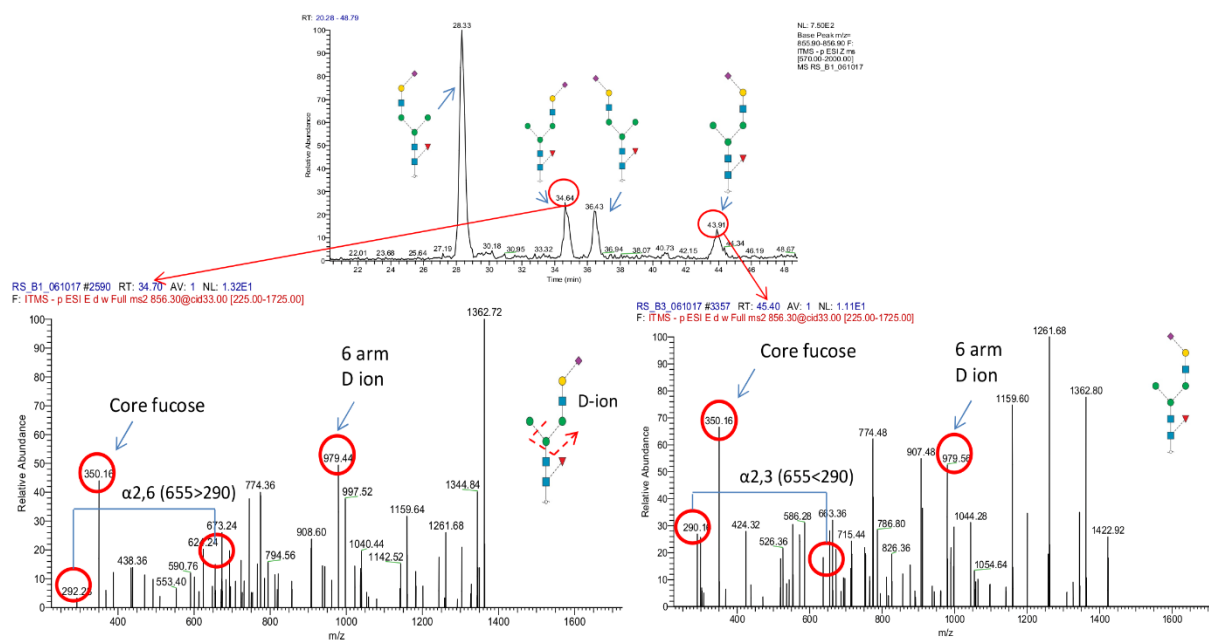

B

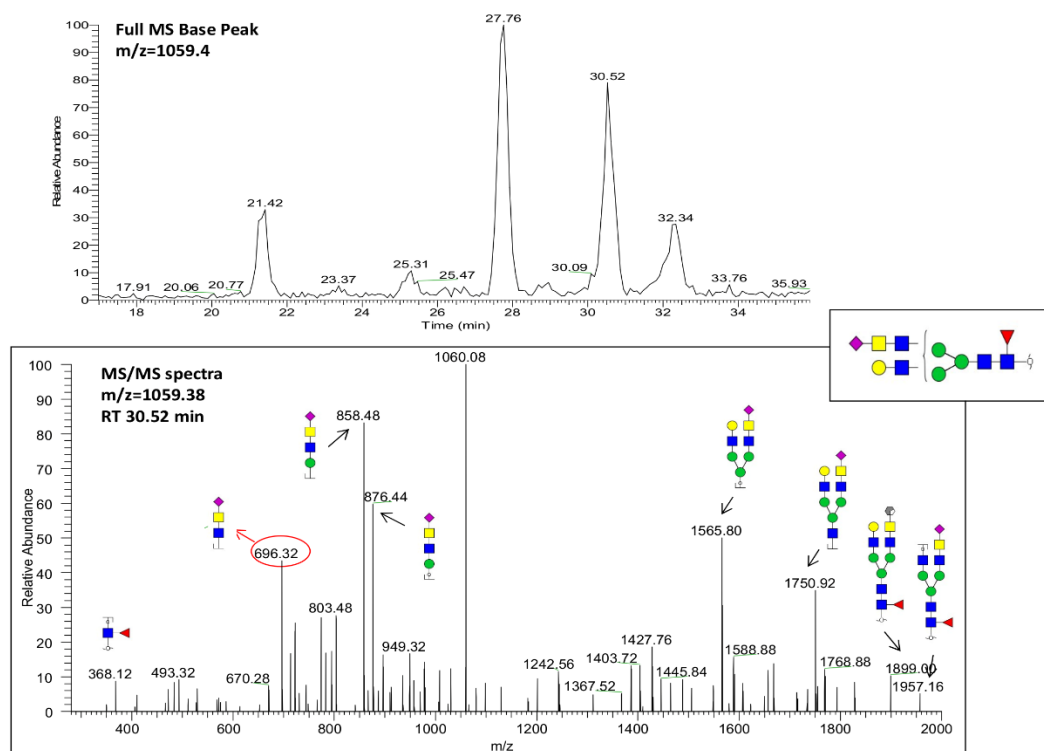

C

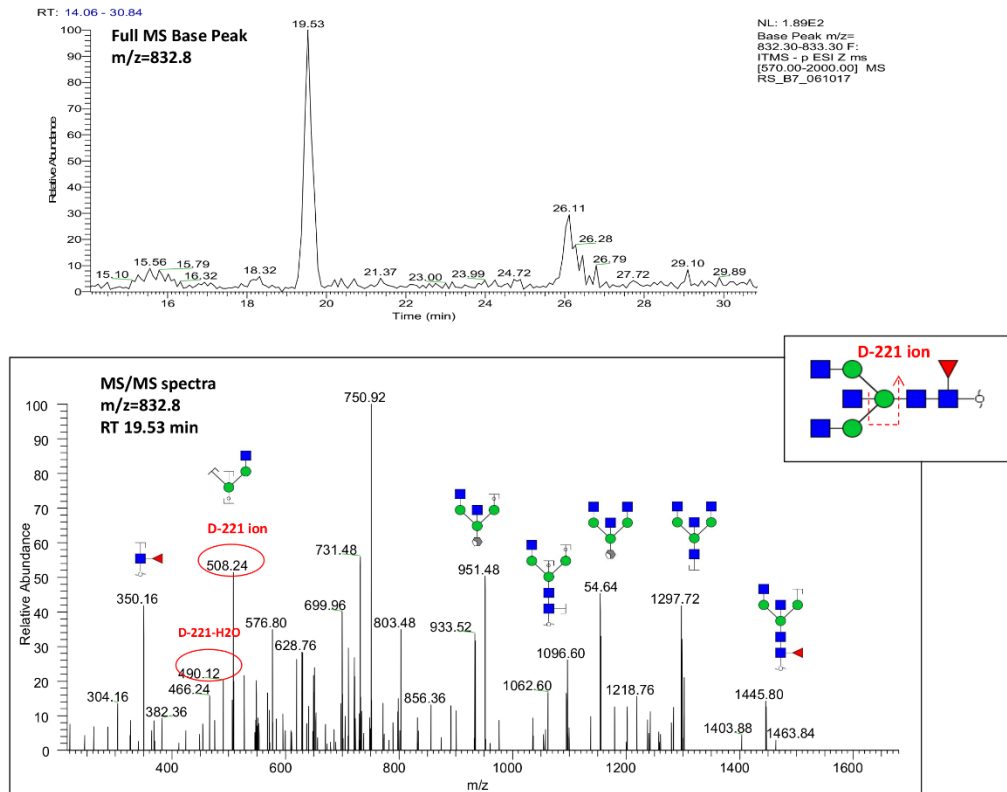

D

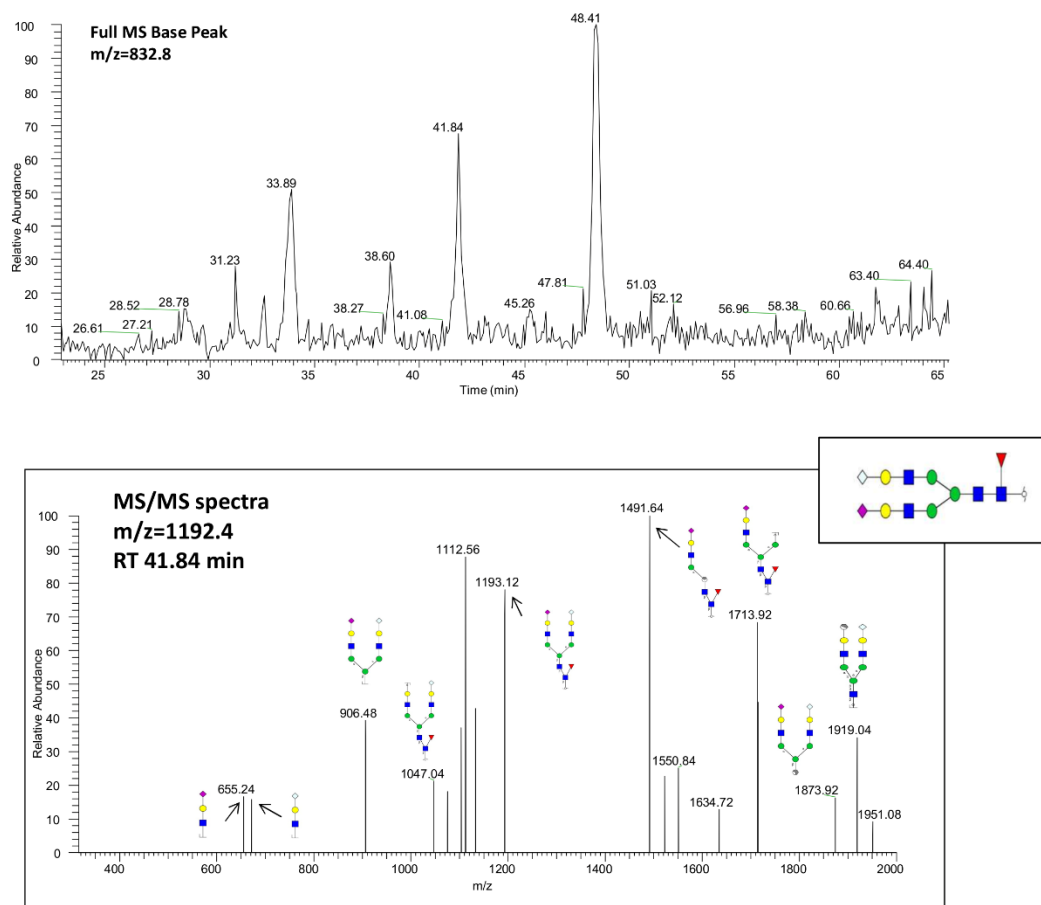

## Supplementary Figure S2

**A**

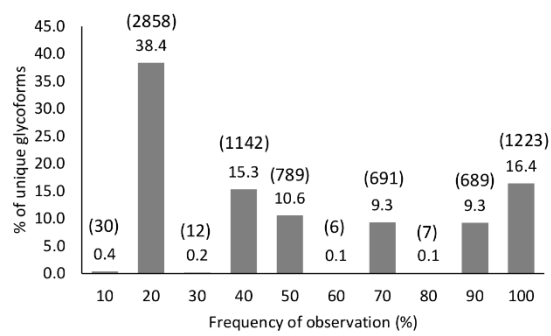

**B**

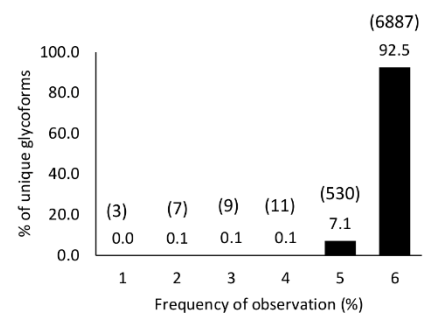

Supplement: MCPRO_MCP/2020/002320_6.pdf [file mmc1.pdf]
